# Supplementary material for: Facet-dependent electrochemical performance and electronic structure of LiCoO2 polyhedral particles revealed by microscopic resonant X-ray photoelectron spectroscopy
Source: Royal Society of Chemistry journal article supplement (doi:10.1039/d2ce01185a), 2022-10-20
Supplement: d2ce01185a1.pdf [file d2ce01185a1.pdf]

## Supporting information

### **Facet dependent electrochemical performance and electronic structure of LiCoO<sub>2</sub> polyhedral particles revealed by microscopic resonant X-ray photoelectron spectroscopy**

Wenxiong Zhang<sup>a</sup>, Eiji Hosono<sup>b,c,d,\*</sup>, Daisuke Asakura<sup>b,c,d</sup>, Shingo Tanaka<sup>b,e</sup>,  
Masaki Kobayashi<sup>f,g</sup>, Naoka Nagamura<sup>h</sup>, Masaharu Oshimai<sup>i</sup>, Jun Miyawaki<sup>a,i</sup>,  
Hisao Kiuchi<sup>a</sup>, Yoshihisa Harada<sup>a,d,i,\*</sup>

<sup>a</sup> Institute for Solid State Physics (ISSP), The University of Tokyo, 5-1-5 Kashiwanoha, Kashiwa, Chiba 277-8581, Japan

<sup>b</sup> Global Zero Emission Research Center, National Institute of Advanced Industrial Science and Technology (AIST), 16-1 Onogawa, Tsukuba, Ibaraki 305-8569, Japan

<sup>c</sup> Research Institute for Energy Conservation, National Institute of Advanced Industrial Science and Technology (AIST), 1-1-1 Higashi, Tsukuba, Ibaraki 305-8565, Japan

<sup>d</sup> AIST-UTokyo Advanced Operando-Measurement Technology Open Innovation Laboratory, 5-1-5 Kashiwanoha, Kashiwa, Chiba 277-8565, Japan

<sup>e</sup> Research Institute of Electrochemical Energy, National Institute of Advanced Industrial Science and Technology (AIST), 1-8-31, Midorigaoka, Ikeda, Osaka 563-8577, Japan.

<sup>f</sup> Department of Electrical Engineering and Information Systems, The University of Tokyo, 7-3-1 Hongo, Bunkyo-ku, Tokyo 113-8656, Japan

<sup>g</sup> Center for Spintronic Research Network, The University of Tokyo, 7-3-1 Hongo, Bunkyo-ku, Tokyo

<sup>h</sup> Research Center for Advanced Measurement and Characterization, National Institute for Materials Science (NIMS), 1-2-1 Sengen, Tsukuba, Ibaraki 305-0047, Japan

<sup>i</sup> Synchrotron Radiation Research Organization, The University of Tokyo, 7-3-1 Hongo, Bunkyo-ku, Tokyo, 113-8656, Japan

**\*Corresponding authors**

Yoshihisa Harada:

Tel.: (+81)791-58-1973 (6620) E-mail address: harada@issp.u-tokyo.ac.jp

Eiji Hosono:

Tel.: (+81)29-861-5169 E-mail address: e-hosono@aist.go.jp

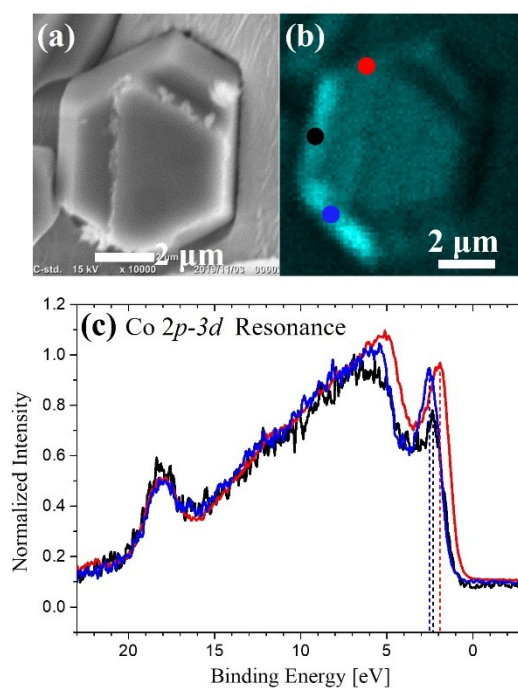

**Fig. S1** (a) SEM image and (b) O 1s photoelectron intensity mapping image of LiCoO<sub>2</sub> particle. (c) Facet-dependent RXPS of LiCoO<sub>2</sub> particle with an incident photon energy of 780.60 eV.

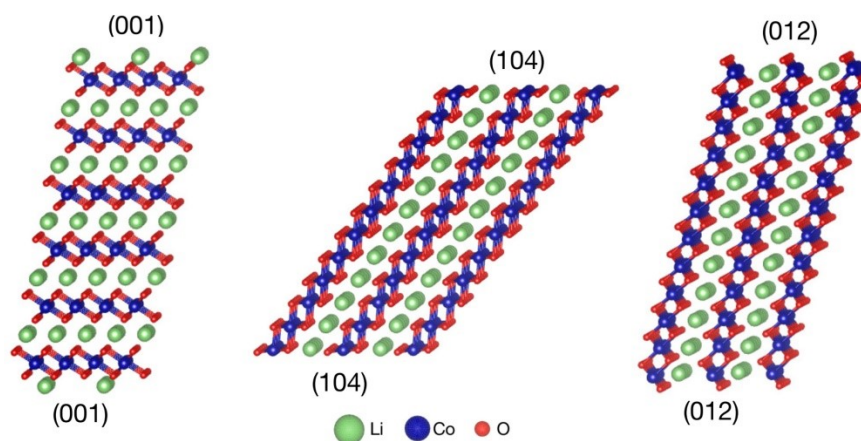

**Fig. S2** Slab models (shown in the extended unit cells) for simulating the (001), (104), and (012) surfaces. (001) and (012) are polar surfaces, while (104) is nonpolar surface. Adapted with permission from ref 1. Copyright 2019 American Chemical Society.

## Reference

1. L. Hong, L. Hu, J. W. Freeland, J. Cabana, S. Ögüt and R. F. Klie, *J. Phys. Chem. C*, 2019, **123**, 8851-8858.
